# Supplementary material
Source: publisher site journal article supplement (https://www.dovepress.com/article/258631)
Supplement: Supplementary file 1 [file get_supplementary_file.php]

**Supplementary Tables.**

**Table S1.** Correlations between clinical characteristics and BST2 expression in glioma patients.

| **Variables** | **WHO grade III** | | | | **WHO grade IV** | | | |
| --- | --- | --- | --- | --- | --- | --- | --- | --- |
| **Cases**  **(n=38)** | **BST2 expression level** | | **P valuea** | **Cases**  **(n=47)** | **BST2 expression level** | | **P valueb** |
| **Low (n=25)** | **High (n=13)** | **Low (n=20)** | **High (n=27)** |
| **Gender** |  |  |  | 1.000 |  |  |  | 0.381 |
| Female | 15 | 10 | 5 |  | 15 | 5 | 10 |  |
| Male | 23 | 15 | 8 |  | 32 | 15 | 17 |  |
| **Age (years)** |  |  |  | 1.000 |  |  |  | 0.381 |
| ≤ 50 | 27 | 18 | 9 |  | 15 | 5 | 10 |  |
| > 50 | 11 | 7 | 4 |  | 32 | 15 | 17 |  |
| **Tumor size** |  |  |  | 0.689 |  |  |  | 0.107 |
| ≤ 5.0 cm | 29 | 20 | 9 |  | 29 | 15 | 14 |  |
| > 5.0 cm | 9 | 5 | 4 |  | 18 | 5 | 13 |  |
| **Karnofsky score** |  |  |  | 0.456 |  |  |  | 0.251 |
| < 90 | 29 | 18 | 11 |  | 21 | 7 | 14 |  |
| ≥ 90 | 9 | 7 | 2 |  | 26 | 13 | 13 |  |
| **Surgery** |  |  |  | 0.375 |  |  |  | 0.523 |
| GTR | 17 | 10 | 7 |  | 20 | 9 | 11 |  |
| STR | 13 | 8 | 5 |  | 18 | 6 | 12 |  |
| PR/biopsy | 8 | 7 | 1 |  | 9 | 5 | 4 |  |
| **Adjuvant therapy** |  |  |  | 0.489 |  |  |  | 0.188 |
| Radiotherapy | 8 | 6 | 2 |  | 6 | 4 | 2 |  |
| Chemotherapy | 6 | 5 | 1 |  | 13 | 7 | 6 |  |
| Combined therapy | 24 | 14 | 10 |  | 28 | 9 | 19 |  |

Note: a, fisher exact test (two-sided); b, chi-square test (two-sided).

**Table S2.** Univariate analyses for overall survival of glioma patients.

| **Variables** | **WHO grade III** | | | **WHO grade IV** | | |
| --- | --- | --- | --- | --- | --- | --- |
| **Cases**  **(n=38)** | **Overall survival time**  **(Mean ± s.d)/months** | **P value** | **Cases**  **(n=47)** | **Overall survival time**  **(Mean ± s.d)/months** | **P value** |
| **Gender** |  |  | 0.671 |  |  | 0.111 |
| Female | 15 | 38.73 ± 4.81 |  | 15 | 28.73 ± 4.57 |  |
| Male | 23 | 33.89 ± 4.19 |  | 32 | 20.19 ± 2.89 |  |
| **Age (years)** |  |  | 0.145 |  |  | <0.001* |
| ≤ 50 | 27 | 32.36 ± 3.78 |  | 15 | 12.11 ± 1.46 |  |
| > 50 | 11 | 45.18 ± 4.69 |  | 32 | 27.61 ± 3.11 |  |
| **Tumor size** |  |  | 0.244 |  |  | 0.021* |
| ≤ 5.0 cm | 29 | 38.62 ± 3.67 |  | 29 | 26.79 ± 3.35 |  |
| > 5.0 cm | 9 | 29.78 ± 6.19 |  | 18 | 16.54 ± 2.97 |  |
| **Karnofsky score** |  |  | 0.137 |  |  | 0.367 |
| < 90 | 29 | 31.96 ± 3.74 |  | 21 | 26.19 ± 4.27 |  |
| ≥ 90 | 9 | 48.14 ± 2.82 |  | 26 | 20.62 ± 2.91 |  |
| **Surgery** |  |  | 0.145 |  |  | <0.001* |
| GTR | 17 | 39.98 ± 5.26 |  | 20 | 28.43 ± 4.31 |  |
| STR | 13 | 30.81 ± 4.70 |  | 18 | 22.17 ± 2.96 |  |
| PR/biopsy | 8 | 35.42 ± 6.32 |  | 9 | 9.50 ± 0.85 |  |
| **Adjuvant therapy** |  |  | 0.124 |  |  | 0.003* |
| Radiotherapy | 8 | 46.67 ± 7.35 |  | 6 | 11.33 ± 1.96 |  |
| Chemotherapy | 6 | 22.00 ± 7.09 |  | 13 | 15.46 ± 2.84 |  |
| Combined therapy | 24 | 37.82 ± 3.63 |  | 28 | 28.60 ± 3.38 |  |
| **BST2 expression** |  |  | 0.070 |  |  | 0.705 |
| Low | 25 | 40.20 ± 3.81 |  | 20 | 24.31 ± 4.92 |  |
| High | 13 | 28.60 ± 5.16 |  | 27 | 22.98 ± 2.68 |  |

Note: * Statistically significant by log-rank test.
